# Supplementary material for: Comparative genomic analysis of Staphylococcus aureus isolates associated with either bovine intramammary infections or human infections demonstrates the importance of restriction-modification systems in host adaptation
Source: PubMed Central journal article supplement (PMC8942034; doi:10.1099/mgen.0.000779), 2022-02-18
Supplement: mgen-8-0779-s001.pdf [file mgen-8-0779-s001.pdf]

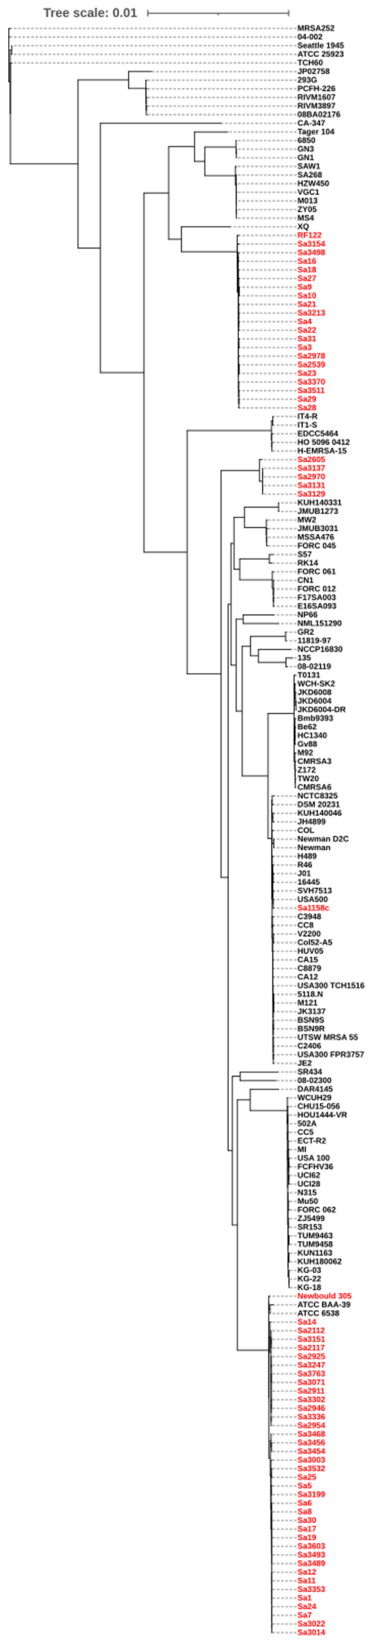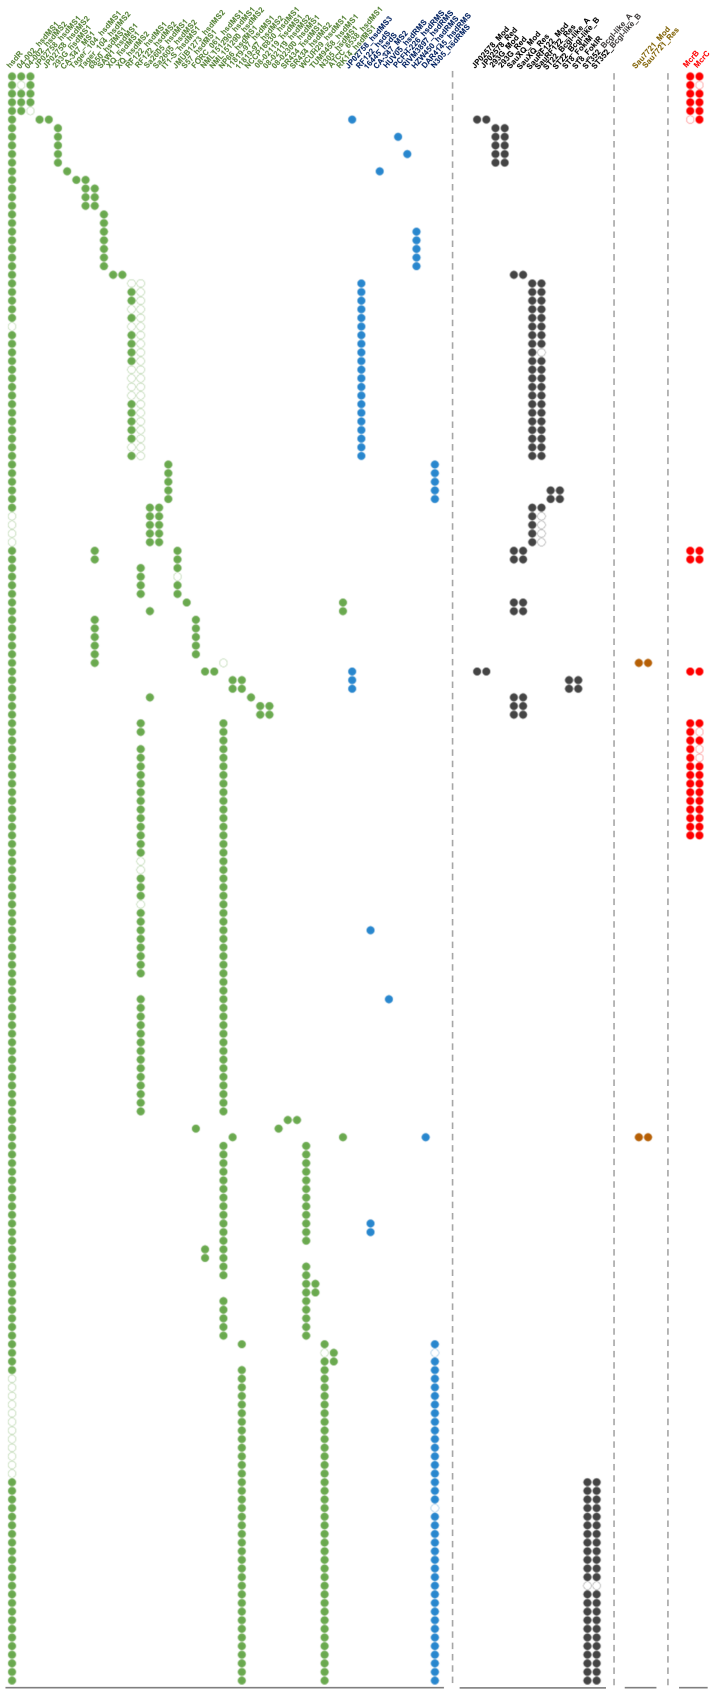

Type I      Type II      III      IV

**Fig. S1. Distribution of restriction-modification genes in 187 *S. aureus*.** The phylogenomic tree of 187 *S. aureus* and aligned R-M genes show the lineage-specific distribution of the R-M genes. Both human and bovine IMI-associated *S. aureus* isolates mainly possessed Type I/II R-M systems and only few human isolates carried Type III/IV R-M genes. In the Type I R-M system, the green circular boxes indicate the Type I R-M system genes (*hsdR* and *hsdMS*) located in  $vSa\alpha$  and  $vSa\beta$  as part of the core genome. The blue circular boxes show additional Type I R-M *hsdRMS* genes which are not a part of the *S. aureus* core genome. While each of the *hsdMS* genes shown in green are interchangeable, part of the same R-M system, and should, in combination with the *hsdR*, form a functional complex, the Type I R-M system genes shown in blue would not be expected to be interchangeable, and would instead form a separate, and independent Type I R-M system. The isolates in red in the phylogenomic tree were originated from bovine. The colored circles represent the presence of the R-M genes, and the open circles indicate the inactivated R-M genes.

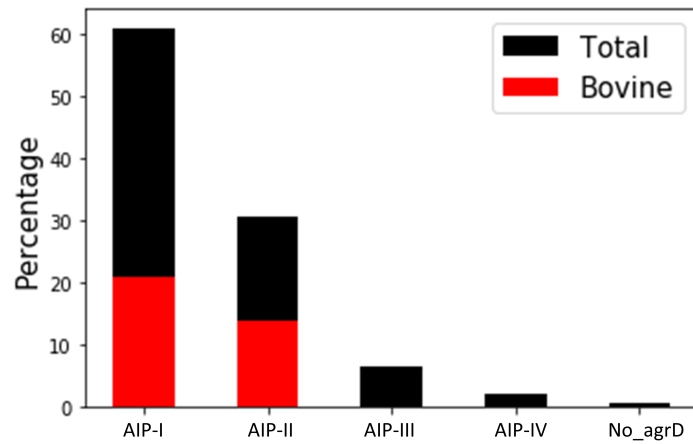

**Fig. S2. Distribution of AIPs in 187 *S. aureus*.** AIP-I precursor was the most prevalent in *S. aureus* in this study, followed by AIP-II. AIP-I and II were found in bovine isolates (n = 65), while all four known AIP types were found in human isolates (n = 122). Among human isolates, only small fraction of the population encoded AIP-III (n = 13) and AIP-IV (n = 4).

Additional File 1

| No. | Strain name  | Accession no. NCBI                    | Genome structure | Country of origin | Host   | Disease/clinical information                  | ST      | CC      | year | Seq.  |                             |
|-----|--------------|---------------------------------------|------------------|-------------------|--------|-----------------------------------------------|---------|---------|------|-------|-----------------------------|
| 1   | Sa1          | JAANBU00000000                        | Draft genome     | Canada            | Bovine | Intramammary infection                        | ST352   | CC97    | 2007 | I     | Legend                      |
| 2   | Sa3          | JAANBR00000000                        | Draft genome     | Canada            | Bovine | Intramammary infection                        | ST151   | CC151   | 2007 | I     | SG Shotgun sequencing       |
| 3   | Sa4          | JAANGD00000000                        | Draft genome     | Canada            | Bovine | Intramammary infection                        | ST151   | CC151   | 2007 | I     | PB PacBio                   |
| 4   | Sa5          | JAANCB00000000                        | Draft genome     | Canada            | Bovine | Intramammary infection                        | Unknown | Unknown | 2007 | I     | I Illumina                  |
| 5   | Sa6          | JAANCH00000000                        | Draft genome     | Canada            | Bovine | Intramammary infection                        | ST352   | CC97    | 2007 | I     | R Roche (454)               |
| 6   | Sa7          | JAANBN00000000                        | Draft genome     | Canada            | Bovine | Intramammary infection                        | ST352   | CC97    | 2007 | I     | SL SOLID                    |
| 7   | Sa8          | JAANCD00000000                        | Draft genome     | Canada            | Bovine | Intramammary infection                        | ST352   | CC97    | 2008 | I     | O Oxford nanopore           |
| 8   | Sa9          | JAANBZ00000000                        | Draft genome     | Canada            | Bovine | Intramammary infection                        | ST151   | CC151   | 2007 | I     | IT Ion Torrent              |
| 9   | Sa10         | JAANCE00000000                        | Draft genome     | Canada            | Bovine | Intramammary infection                        | ST151   | CC151   | 2007 | I     | * Unknown or not applicable |
| 10  | Sa11         | JAANCA00000000                        | Draft genome     | Canada            | Bovine | Intramammary infection                        | ST352   | CC97    | 2007 | I     | - Unknown or not applicable |
| 11  | Sa12         | JAANCC00000000                        | Draft genome     | Canada            | Bovine | Intramammary infection                        | ST352   | CC97    | 2008 | I     | bold Reference strains      |
| 12  | Sa14         | JAANCF00000000                        | Draft genome     | Canada            | Bovine | Intramammary infection                        | ST3028  | CC97    | 2007 | I     | y Yes                       |
| 13  | Sa16         | JAANBM00000000                        | Draft genome     | Canada            | Bovine | Intramammary infection                        | ST151   | CC151   | 2007 | I     | n No                        |
| 14  | Sa17         | JAANBL00000000                        | Draft genome     | Canada            | Bovine | Intramammary infection                        | ST352   | CC97    | 2007 | I     |                             |
| 15  | Sa18         | JAANBK00000000                        | Draft genome     | Canada            | Bovine | Intramammary infection                        | ST2185  | CC151   | 2008 | I     |                             |
| 16  | Sa19         | JAANBW00000000                        | Draft genome     | Canada            | Bovine | Intramammary infection                        | ST352   | CC97    | 2008 | I     |                             |
| 17  | Sa21         | JAANBX00000000                        | Draft genome     | Canada            | Bovine | Intramammary infection                        | ST151   | CC151   | 2007 | I     |                             |
| 18  | Sa22         | JAANYD00000000                        | Draft genome     | Canada            | Bovine | Intramammary infection                        | ST151   | CC151   | 2007 | I     |                             |
| 19  | Sa23         | JAANBP00000000                        | Draft genome     | Canada            | Bovine | Intramammary infection                        | ST151   | CC151   | 2007 | I     |                             |
| 20  | Sa24         | JAANSO00000000                        | Draft genome     | Canada            | Bovine | Intramammary infection                        | ST352   | CC97    | 2007 | I     |                             |
| 21  | Sa25         | JAANBO00000000                        | Draft genome     | Canada            | Bovine | Intramammary infection                        | ST352   | CC97    | 2007 | I     |                             |
| 22  | Sa27         | JAANBR00000000                        | Draft genome     | Canada            | Bovine | Intramammary infection                        | ST151   | CC151   | 2019 | I     |                             |
| 23  | Sa28         | JAANHO00000000                        | Draft genome     | Canada            | Bovine | Intramammary infection                        | ST151   | CC151   | 2019 | I     |                             |
| 24  | Sa29         | JAANBO00000000                        | Draft genome     | Canada            | Bovine | Intramammary infection                        | ST151   | CC151   | 2019 | I     |                             |
| 25  | Sa30         | JAANBE00000000                        | Draft genome     | Canada            | Bovine | Intramammary infection                        | ST352   | CC97    | 2019 | I     |                             |
| 26  | Sa31         | JAANBE00000000                        | Draft genome     | Canada            | Bovine | Intramammary infection                        | ST151   | CC151   | 2007 | I     |                             |
| 27  | Sa1158c      | SRR11471981                           | Draft genome     | Canada            | Bovine | Intramammary infection                        | ST8     | CC8     | 2008 | I     |                             |
| 28  | Sa212        | SRR11471976                           | Draft genome     | Canada            | Bovine | Intramammary infection                        | ST2187  | CC97    | 2007 | I     |                             |
| 29  | Sa217        | SRR11471989                           | Draft genome     | Canada            | Bovine | Intramammary infection                        | ST2187  | CC97    | 2007 | I     |                             |
| 30  | Sa2539       | SRR11471965                           | Draft genome     | Canada            | Bovine | Intramammary infection                        | ST151   | CC151   | 2007 | I     |                             |
| 31  | Sa2605       | SRR11471994                           | Draft genome     | Canada            | Bovine | Intramammary infection                        | ST126   | CC126   | 2008 | I     |                             |
| 32  | Sa2911       | SRR11471986                           | Draft genome     | Canada            | Bovine | Intramammary infection                        | ST2187  | CC97    | 2008 | I     |                             |
| 33  | Sa2925       | SRR11471988                           | Draft genome     | Canada            | Bovine | Intramammary infection                        | ST2187  | CC97    | 2007 | I     |                             |
| 34  | Sa2946       | SRR11471975                           | Draft genome     | Canada            | Bovine | Intramammary infection                        | ST2187  | CC97    | 2007 | I     |                             |
| 35  | Sa2954       | SRR11471977                           | Draft genome     | Canada            | Bovine | Intramammary infection                        | ST2187  | CC97    | 2007 | I     |                             |
| 36  | Sa2970       | SRR11471973                           | Draft genome     | Canada            | Bovine | Intramammary infection                        | ST2270  | CC126   | 2007 | I     |                             |
| 37  | Sa2978       | SRR11471964                           | Draft genome     | Canada            | Bovine | Intramammary infection                        | ST151   | CC151   | 2008 | I     |                             |
| 38  | Sa3003       | SRR11471960                           | Draft genome     | Canada            | Bovine | Intramammary infection                        | ST352   | CC97    | 2007 | I     |                             |
| 39  | Sa3014       | SRR11471958                           | Draft genome     | Canada            | Bovine | Intramammary infection                        | ST352   | CC97    | 2008 | I     |                             |
| 40  | Sa3022       | SRR11471957                           | Draft genome     | Canada            | Bovine | Intramammary infection                        | ST352   | CC97    | 2007 | I     |                             |
| 41  | Sa3071       | SRR11471985                           | Draft genome     | Canada            | Bovine | Intramammary infection                        | ST2187  | CC97    | 2008 | I     |                             |
| 42  | Sa3129       | SRR11471990                           | Draft genome     | Canada            | Bovine | Intramammary infection                        | ST2270  | CC126   | 2008 | I     |                             |
| 43  | Sa3131       | SRR11471991                           | Draft genome     | Canada            | Bovine | Intramammary infection                        | ST2270  | CC126   | 2008 | I     |                             |
| 44  | Sa3137       | SRR11471992                           | Draft genome     | Canada            | Bovine | Intramammary infection                        | ST2270  | CC126   | 2008 | I     |                             |
| 45  | Sa3151       | SRR11471971                           | Draft genome     | Canada            | Bovine | Intramammary infection                        | ST2187  | CC97    | 2008 | I     |                             |
| 46  | Sa3154       | SRR11471968                           | Draft genome     | Canada            | Bovine | Intramammary infection                        | ST351   | CC151   | 2007 | I     |                             |
| 47  | Sa3199       | SRR11471956                           | Draft genome     | Canada            | Bovine | Intramammary infection                        | ST352   | CC97    | 2008 | I     |                             |
| 48  | Sa3213       | SRR11471970                           | Draft genome     | Canada            | Bovine | Intramammary infection                        | ST151   | CC151   | 2007 | I     |                             |
| 49  | Sa3247       | SRR11471974                           | Draft genome     | Canada            | Bovine | Intramammary infection                        | ST2187  | CC97    | 2008 | I     |                             |
| 50  | Sa3302       | SRR11471972                           | Draft genome     | Canada            | Bovine | Intramammary infection                        | ST2187  | CC97    | 2008 | I     |                             |
| 51  | Sa3336       | SRR11471993                           | Draft genome     | Canada            | Bovine | Intramammary infection                        | ST2187  | CC97    | 2008 | I     |                             |
| 52  | Sa3363       | SRR11471959                           | Draft genome     | Canada            | Bovine | Intramammary infection                        | ST352   | CC97    | 2007 | I     |                             |
| 53  | Sa3370       | SRR11471963                           | Draft genome     | Canada            | Bovine | Intramammary infection                        | ST151   | CC151   | 2008 | I     |                             |
| 54  | Sa3454       | SRR11471984                           | Draft genome     | Canada            | Bovine | Intramammary infection                        | ST352   | CC97    | 2008 | I     |                             |
| 55  | Sa3456       | SRR11471983                           | Draft genome     | Canada            | Bovine | Intramammary infection                        | ST352   | CC97    | 2007 | I     |                             |
| 56  | Sa3468       | SRR11471982                           | Draft genome     | Canada            | Bovine | Intramammary infection                        | ST352   | CC97    | 2008 | I     |                             |
| 57  | Sa3489       | SRR11471978                           | Draft genome     | Canada            | Bovine | Intramammary infection                        | ST352   | CC97    | 2008 | I     |                             |
| 58  | Sa3493       | SRR11471962                           | Draft genome     | Canada            | Bovine | Intramammary infection                        | ST352   | CC97    | 2008 | I     |                             |
| 59  | Sa3498       | SRR11471966                           | Draft genome     | Canada            | Bovine | Intramammary infection                        | ST151   | CC151   | 2007 | I     |                             |
| 60  | Sa3511       | SRR11471969                           | Draft genome     | Canada            | Bovine | Intramammary infection                        | ST151   | CC151   | 2007 | I     |                             |
| 61  | Sa3532       | SRR11471980                           | Draft genome     | Canada            | Bovine | Intramammary infection                        | ST352   | CC97    | 2007 | I     |                             |
| 62  | Sa3603       | SRR11471979                           | Draft genome     | Canada            | Bovine | Intramammary infection                        | ST352   | CC97    | 2008 | I     |                             |
| 63  | Sa3763       | SRR11471987                           | Draft genome     | Canada            | Bovine | Intramammary infection                        | ST2187  | CC97    | 2007 | I     |                             |
| 64  | RF122        | NC_007622                             | Draft genome     | Ireland           | Bovine | Intramammary infection                        | ST151   | CC151   | 1993 | I     |                             |
| 65  | Newbuild 305 | NZ_AKYW0100001 - NZ_AKYW01000028      | Highly assembled | Canada            | Bovine | Clinical mastitis                             | ST115   | CC97    | 1958 | I     |                             |
| 66  | 04-002       | NZ_CP038021                           | Highly assembled | USA               | Human  | Abdominal wound                               | ST30    | CC30    | 2004 | PB    |                             |
| 67  | 08-02119     | NZ_CP015645                           | Highly assembled | Germany           | Human  | Wound infection                               | ST582   | CC15    | 2008 | PB, I |                             |
| 68  | 08-02300     | NZ_CP015646                           | Highly assembled | Germany           | Human  | Wound infection                               | ST77    |         | 2008 | PB, I |                             |
| 69  | 08BA02176    | NC_018608                             | Highly assembled | Canada            | Human  | LA-MRSA origin, soft tissue infection of skin | ST398   |         | 2008 | R     |                             |
| 70  | 11819-97     | NC_017351, NC_017350                  | Highly assembled | Denmark           | Human  | CA-MRSA, skin abscess                         | ST80    |         | 1997 | I, R  |                             |
| 71  | 135          | NZ_CP022720, NZ_CP022721              | Highly assembled | Germany           | Human  | Bacteremia                                    | ST115   | CC15    | 1994 | I, PB |                             |
| 72  | 16445        | NZ_CP043302, NZ_CP043303              | Highly assembled | USA               | Human  |                                               | ST8     | CC8     | 2019 | O     |                             |
| 73  | 293G         | NZ_CP019591                           | Highly assembled | Canada            | Human  |                                               | ST398   |         |      | I, PB |                             |
| 74  | 502A         | NZ_CP007454, NZ_CP007455              | Highly assembled | USA               | Human  | Colonization                                  | ST5     | CC5     | 1963 | PB    |                             |
| 75  | 5118.N       | NZ_CP016855, NZ_CP016854, NZ_CP025482 | Highly assembled | USA               | Human  | Nose from military trainee                    | ST8     | CC8     | 2010 | I     |                             |
| 76  | 6850         | NC_022222                             | Highly assembled | USA               | Human  | Bacteremia                                    | ST150   |         |      | R, SG |                             |
| 77  | ATCC_25923   | NZ_CP009361, NZ_CP009362              | Highly assembled | USA               | Human  |                                               | ST243   | CC30    | 1945 | PB    |                             |
| 78  | ATCC_6538    | NZ_CP020020, NZ_CP020021              | Highly assembled | Germany           | Human  | Pleural fluid                                 | ST464   | CC97    | 1884 | PB, I |                             |
| 79  | ATCC_BAA-39  | NZ_CP033505                           | Highly assembled | Kazakhstan        | Human  |                                               | ST464   | CC97    | 2017 | PB    |                             |
| 80  | BSN9R        | NZ_CP042348, NZ_CP042349              | Highly assembled | USA               | Human  | Infective endocarditis                        | ST8     | CC8     | 2018 | O, I  |                             |
| 81  | BSN9S        | NZ_CP042346, NZ_CP042347              | Highly assembled | USA               | Human  | Infective endocarditis                        | ST8     | CC8     | 2018 | O, I  |                             |
| 82  | Ba62         | NZ_CP012013, NZ_CP012014              | Highly assembled | Brazil            | Human  | Blood stream infection                        | ST239   | CC8     | 1996 | R     |                             |
| 83  | Bmb19393     | NC_021670.1, NC_021657.1              | Highly assembled | Brazil            | Human  | Blood stream infection                        | ST239   | CC8     | 1993 | R     |                             |
| 84  | C2406        | CP016690                              | Highly assembled | Canada            | Human  | USA300, Necrotizing pneumonia                 | ST8     | CC8     |      | PB    |                             |
| 85  | C3948        | CP020957                              | Highly assembled | Canada            | Human  | MSSA                                          | ST8     | CC8     |      | PB    |                             |
| 86  | C8879        | NZ_CP020956                           | Highly assembled | Canada            | Human  | MRSA                                          | ST8     | CC8     |      | PB    |                             |
| 87  | CA-347       | NC_021554, NC_021552                  | Highly assembled | USA               | Human  | USA600                                        | ST45    | CC45    | 2005 | I, PB |                             |
| 88  | CA12         | NZ_CP007672, NZ_CP007673              | Highly assembled | Colombia          | Human  | Bacteremia                                    | ST8     | CC8     | 2007 | PB    |                             |
| 89  | CA15         | NZ_CP007674, NZ_CP007675              | Highly assembled | Colombia          | Human  | Bacteremia                                    | ST8     | CC8     | 2007 | PB    |                             |
| 90  | CC5          | NZ_CP021105                           | Highly assembled | Brazil            | Human  | Respiratory tract infection                   | ST5     | CC5     | 2014 | I     |                             |
| 91  | CC8          | NZ_AP017377                           | Highly assembled | Russia            | Human  |                                               | ST8     | CC8     | 2007 | PB    |                             |
| 92  | CHU15-056    | NZ_CP021171                           | Highly assembled | Brazil            | Human  | Bloodstream infection                         | ST5     | CC5     | 2015 | I     |                             |
| 93  | CMRSA3       | CP02685, MH470063                     | Highly assembled | Canada            | Human  | MRSA                                          | ST241   | CC8     |      | I, PB |                             |
| 94  | CMRSA6       | CP027788                              | Highly assembled | Canada            | Human  | MRSA                                          | ST239   | CC8     |      | I, PB |                             |
| 95  | CN1          | NC_022226, NC_022227, NC_022228       | Highly assembled | South Korea       | Human  | PVL-negative CA-MRSA                          | ST72    | CC8     |      | R     |                             |
| 96  | COL          | NC_002951, NC_006629                  | Highly assembled | USA               | Human  | MRSA                                          | ST250   | CC8     | 1976 | SG    |                             |
| 97  | Col52-A5     | NZ_CP040580, NZ_CP040581              | Highly assembled | Colombia          | Human  | Colonization                                  | ST923   | CC8     | 2017 | PB    |                             |
| 98  | DAR4145      | NZ_CP010526                           | Highly assembled | India             | Human  | MRSA                                          | ST772   | CC1     | 2009 | PB    |                             |
| 99  | DSM_20231    | NZ_CP011526, NZ_CP011527              | Highly assembled | Human             |        |                                               | ST8     | CC8     | 1884 | PB    |                             |
| 100 | E16SA093     | NZ_CP031131                           | Highly assembled | South Korea       | Human  | Blood stream infection                        | ST72    | CC8     | 2016 | PB    |                             |
| 101 | ECT-R2       | NC_017343, NC_017346, NC_017344       | Highly assembled | Sweden            | Human  | MR-MSSA                                       | ST5     | CC5     | 2005 | R     |                             |
| 102 | EDCC5464     | NZ_CP022291                           | Highly assembled | Germany           | Human  | Implant associated bone infection             | ST22    | CC22    | 2015 | PB    |                             |
| 103 | F17SA003     | NZ_CP031130                           | Highly assembled | South Korea       | Human  | Blood stream infection                        | ST72    | CC8     | 2017 | PB    |                             |
| 104 | FCFHV36      | NZ_CP011147                           | Highly assembled | Brazil            | Human  | Osteomyelitis                                 | ST105   | CC5     | 2010 | I     |                             |

|     |                |                                                                 |                  |              |       |                                                    |         |         |      |           |
|-----|----------------|-----------------------------------------------------------------|------------------|--------------|-------|----------------------------------------------------|---------|---------|------|-----------|
| 105 | FORC_012       | NZ_CP010998                                                     | Highly assembled | South Korea  | Human | Sputum                                             | ST72    | CC8     | 2009 | I, PB     |
| 106 | FORC_045       | NZ_CP017115                                                     | Highly assembled | South Korea  | Human |                                                    | ST1     | CC1     | 2014 | PB        |
| 107 | FORC_061       | NZ_CP022607, NZ_CP022608                                        | Highly assembled | South Korea  | Human | Food poisoning                                     | ST72    | CC8     | 2017 | PB        |
| 108 | FORC_062       | NZ_CP022582                                                     | Highly assembled | South Korea  | Human | Food poisoning                                     | ST5     | CC5     | 2017 | PB        |
| 109 | GN1            | NZ_AP018349                                                     | Highly assembled | Japan        | Human | MSSA                                               | ST50    |         | 2005 | PB        |
| 110 | GN3            | NZ_AP017891                                                     | Highly assembled | Japan        | Human | MSSA                                               | ST50    |         | 2005 | PB        |
| 111 | GR2            | NZ_CP010402, NZ_CP010403, NZ_CP010404                           | Highly assembled | Greece       | Human |                                                    | ST80    |         | 2006 | R, I      |
| 112 | Gv88           | NZ_CP012018, NZ_CP012017                                        | Highly assembled | Brazil       | Human | Wound infection                                    | ST239   | CC8     | 1997 | R         |
| 113 | H-EMRSA-15     | NZ_CP007659                                                     | Highly assembled | Belgium      | Human | Abscess                                            | ST22    | CC22    | 2011 | I         |
| 114 | H489           | NZ_CP020659                                                     | Highly assembled | Canada       | Human | MSSA                                               | ST8     | CC8     |      | PB        |
| 115 | HC1340         | NZ_CP012011                                                     | Highly assembled | Brazil       | Human | Nasa colonization                                  | ST239   | CC8     | 2001 | R         |
| 116 | HOU1444-VR     | NZ_CP012593, NZ_CP012594, NZ_CP012595, NZ_CP012596              | Highly assembled | Brazil       | Human | Bacteremia                                         | ST5     | CC5     | 2012 | PB        |
| 117 | HO_5096_0412   | NC_017763                                                       | Highly assembled | UK           | Human | Fatal neonatal infection                           | ST22    | CC22    | 2005 | I         |
| 118 | HUV05          | NZ_CP007676, NZ_CP007677, NZ_CP007678, NZ_CP007679              | Highly assembled | Colombia     | Human | Bacteremia                                         | ST8     | CC8     | 2006 | PB        |
| 119 | HZJH450        | NZ_CP020741                                                     | Highly assembled | China        | Human | Impetigo                                           | ST59    |         | 2016 | PB        |
| 120 | IT1-S          | NZ_CP028468, NZ_CP028469                                        | Highly assembled | Italy        | Human | Endocarditis                                       | ST22    | CC22    | 2013 | I         |
| 121 | IT4-R          | NZ_CP028470, NZ_CP028471                                        | Highly assembled | Italy        | Human | Endocarditis                                       | ST22    | CC22    | 2013 | I         |
| 122 | J01            | NZ_CP040619, NZ_CP040620, NZ_CP040621                           | Highly assembled | USA          | Human | Infective endocarditis                             | ST8     | CC8     | 2011 | I, PB     |
| 123 | JE2            | NZ_CP020619                                                     | Highly assembled | USA          | Human | Soft tissue infections                             | ST8     | CC8     | 2013 | I, PB     |
| 124 | JH4899         | NZ_AP014921, NZ_AP014922                                        | Highly assembled | Japan        | Human | Invasive growth                                    | ST8     | CC8     | 2013 | I         |
| 125 | JK3137         | CP020960                                                        | Highly assembled | Canada       | Human | MRSA                                               | ST8     | CC8     |      | PB        |
| 126 | JKD6004-DR     | NZ_CP040625                                                     | Highly assembled | USA          | Human |                                                    | ST239   | CC8     | 2019 | I         |
| 127 | JKD6004        | NZ_CP040622                                                     | Highly assembled | Australia    | Human | Pacemaker abscess                                  | ST239   | CC8     | 2004 | I, PB     |
| 128 | JKD6008        | CP002120                                                        | Highly assembled | New Zealand  | Human | MRSA, VSSA                                         | ST239   | CC8     | 2003 | R, SG, SL |
| 129 | JMUB1273       | NZ_AP018922                                                     | Highly assembled | Japan        | Human | Subcutaneous abscess                               | ST188   | CC1     | 2016 | I, O      |
| 130 | JMUB3031       | NZ_AP018923, NZ_AP018924                                        | Highly assembled | Japan        | Human | Subcutaneous abscess                               | ST1     | CC1     | 2017 | PB, I     |
| 131 | JP02758        | NZ_AP017922, NZ_AP017923                                        | Highly assembled | Japan        | Human | Super biofilm-elaborating                          | Unknown | Unknown | 2005 | PB        |
| 132 | KG-03          | NZ_AP019542                                                     | Highly assembled | Japan        | Human | Persistent bacteremia                              | ST5     | CC5     | 2015 | PB, I     |
| 133 | KG-18          | NZ_AP019543, NZ_AP019544                                        | Highly assembled | Japan        | Human | VISA                                               | ST5     | CC5     | 2015 | PB, I     |
| 134 | KG-22          | NZ_AP019545, NZ_AP019546                                        | Highly assembled | Japan        | Human | VISA                                               | ST5     | CC5     | 2015 | PB, I     |
| 135 | KUH140046      | NZ_AP020313, NZ_AP020314                                        | Highly assembled | Japan        | Human | MRSA                                               | ST8     | CC8     | 2014 | I, O      |
| 136 | KUH140331      | NZ_AP020316, NZ_AP020317                                        | Highly assembled | Japan        | Human | MRSA                                               | ST188   | CC1     | 2014 | I, O      |
| 137 | KUH180062      | NZ_AP020320, NZ_AP020321                                        | Highly assembled | Japan        | Human |                                                    | ST764   | CC5     | 2018 | I, O      |
| 138 | KUN1163        | NZ_AP020324, NZ_AP020325                                        | Highly assembled | Japan        | Human |                                                    | ST764   | CC5     | 2006 | I, O      |
| 139 | M013           | NC_018928, NZ_CP039966                                          | Highly assembled | Taiwan       | Human | CA-MRSA                                            | ST59    |         | 2002 | R         |
| 140 | M121           | NZ_CP007670, NZ_CP007671                                        | Highly assembled | Colombia     | Human | Healthy volunteer                                  | ST8     | CC8     | 2004 | I, PB     |
| 141 | M92            | CP015447                                                        | Highly assembled | Canada       | Human | MRSA, Colonization                                 | ST5354  | CC8     |      | PB        |
| 142 | MI             | NZ_AP017320, NZ_AP017321                                        | Highly assembled | Human        | Human | VISA, Peritonitis                                  | ST5     | CC5     | 1997 | I, PB     |
| 143 | MRSA252        | NC_009592                                                       | Highly assembled | UK           | Human | MRSA, Fatal bacteremia                             | ST36    | CC30    | 1997 |           |
| 144 | MS4            | NZ_CP008628                                                     | Highly assembled | China        | Human | Wound exudate of bone fracture                     | ST338   |         | 2012 | I, PB     |
| 145 | MSSA476        | BX571857, BX571858                                              | Highly assembled | Human        | Human | Osteomyelitis and bacteremia                       | ST1     | CC1     | 1998 |           |
| 146 | MW2            | BA000033, AP004932                                              | Highly assembled | USA          | Human | CA-MRSA, septicemia and septic arthritis           | ST1     | CC1     | 1998 | SG        |
| 147 | Mu50           | BA000017, AP003367                                              | Highly assembled | Japan        | Human | Surgical wound infection, VRSA                     | ST5     | CC5     | 1997 | SG        |
| 148 | N315           | BA000018, AP003139                                              | Highly assembled | Japan        | Human | Pharyngeal smear, mecA but methicillin susceptible | ST5     | CC5     | 1982 |           |
| 149 | NCCP18830      | NZ_CP003843, NZ_CP043844                                        | Highly assembled | South Korea  | Human | Diabetes, uricace                                  | ST513   |         | 2008 | PB, IT    |
| 150 | NCTC8325       | NC_007795                                                       | Highly assembled | Human        | Human | Toxic-shock syndrome, staphylococcal scarlet fever | ST8     | CC8     |      |           |
| 151 | NML151290      | MEG20000001-<br>MEG20000008                                     | Highly assembled | Canada       | Human | Endocarditis and septic arthritis                  | ST25    |         |      | I         |
| 152 | NP66           | NZ_CP041037                                                     | Highly assembled | South Africa | Human | Pus aspirate                                       | ST12    |         | 2018 | PB        |
| 153 | Newman         | NC_009641                                                       | Highly assembled | UK           | Human |                                                    | ST254   | CC8     | 1952 | SG        |
| 154 | Newman_D2C     | NZ_CP023391                                                     | Highly assembled | Human        | Human | Osteomyelitis                                      | ST254   | CC8     | 1970 | I         |
| 155 | PCFH-226       | NZ_CP035005, NZ_CP035006                                        | Highly assembled | South Korea  | Human | Healthy, hand                                      | ST541   |         | 2017 | PB        |
| 156 | R46            | NZ_CP039164, NZ_CP039165, NZ_CP039166                           | Highly assembled | Pakistan     | Human |                                                    | ST113   | CC8     | 2017 | I         |
| 157 | RVM1607        | NZ_CP013619, NZ_CP013620                                        | Highly assembled | Netherlands  | Human |                                                    | ST398   |         | 2008 | R, I      |
| 158 | RVM3897        | NZ_CP013621                                                     | Highly assembled | Netherlands  | Human | LA-MRSA, nosocomial transmission                   | ST398   |         | 2008 | R, I      |
| 159 | RK14           | NZ_CP011528, NZ_CP011529                                        | Highly assembled | Germany      | Human | Staphylococcal food poisoning                      | ST27    | CC8     | 2008 | I, PB     |
| 160 | S57            | NZ_CP003136                                                     | Highly assembled | Brazil       | Human | Osteomyelitis                                      | ST9     | CC1     | 2010 | PB        |
| 161 | SA288          | NZ_CP006630                                                     | Highly assembled | China        | Human |                                                    | ST59    |         | 2012 | I         |
| 162 | SAW1           | NZ_CP045468, NZ_CP045469, NZ_CP045470, NZ_CP045471              | Highly assembled | China        | Human | Endocarditis                                       | ST59    |         | 2018 | O         |
| 163 | SR153          | NZ_CP048643, NZ_CP048644, NZ_CP048645, NZ_CP048646              | Highly assembled | China        | Human | Acute pancreatitis                                 | ST5     | CC5     | 2013 | PB        |
| 164 | SR434          | NZ_CP019563, NZ_CP019564, NZ_CP019565, NZ_CP019566, NZ_CP019567 | Highly assembled | China        | Human | Skin abscess                                       | ST88    |         | 2015 | PB        |
| 165 | SVH7513        | NZ_CP029166, NZ_CP029167, NZ_CP029165                           | Highly assembled | Australia    | Human | Cellulitis                                         | ST612   | CC8     | 2009 | PB, I     |
| 166 | Seattle_1945   | NZ_CP021907, NZ_CP021908                                        | Highly assembled | Germany      | Human | PVL+                                               | ST243   | CC30    | 2013 | I         |
| 167 | T0131          | NC_017347                                                       | Highly assembled | China        | Human | MRSA                                               | ST239   | CC8     | 2006 | R         |
| 168 | TCH60          | NC_017342, NC_017345, NZ_CP019305                               | Highly assembled | Human        | Human | MRSA                                               | ST4618  | CC30    |      | R         |
| 169 | TUM9458        | NZ_AP019305                                                     | Highly assembled | Human        | Human |                                                    | ST2389  | CC5     | 2008 | I, O      |
| 170 | TUM9463        | NZ_AP019306                                                     | Highly assembled | Human        | Human |                                                    | ST2389  | CC5     | 2009 | I, O      |
| 171 | TW20           | NC_017331, NC_017352, NC_017332                                 | Highly assembled | UK           | Human | MRSA                                               | ST239   | CC8     | 2003 |           |
| 172 | Tager_104      | NZ_CP012409                                                     | Highly assembled | USA          | Human | Cutaneous abscess                                  | ST49    |         | 1947 | I, PB     |
| 173 | UC128          | NZ_CP018768, NZ_CP018769                                        | Highly assembled | USA          | Human | No contact with swine                              | ST5     | CC5     | 2009 | PB, I     |
| 174 | UC162          | NZ_CP018766, NZ_CP018767                                        | Highly assembled | USA          | Human | No contact with swine                              | ST5     | CC5     | 2010 | PB, I     |
| 175 | USA300_FPR3757 | CP000255, CP000256, CP000257, CP000258                          | Highly assembled | USA          | Human | MRSA                                               | ST8     | CC8     |      | SG        |
| 176 | USA300_TCH1516 | NC_010079, NC_010083, NC_012417                                 | Highly assembled | USA          | Human | CA-MRSA                                            | ST8     | CC8     |      | R         |
| 177 | USA500         | NZ_CP007499, NZ_CP007500                                        | Highly assembled | USA          | Human |                                                    | ST8     | CC8     |      | I, PB     |
| 178 | USA_100        | NZ_CP029474, NZ_CP029475                                        | Highly assembled | USA          | Human |                                                    | ST5     | CC5     | 2015 | I, O      |
| 179 | UTSW_MRSA_55   | NZ_CP013231, NZ_CP013227, NZ_CP013228, NZ_CP013229, NZ_CP013230 | Highly assembled | USA          | Human | Osteomyelitis, MRSA                                | ST8     | CC8     | 2013 | PB        |
| 180 | V2200          | NZ_CP007657                                                     | Highly assembled | Venezuela    | Human | Osteomyelitis                                      | ST923   | CC8     | 2007 | PB        |
| 181 | VGC1           | NZ_CP039448, NZ_CP039449, NZ_CP039450                           | Highly assembled | Taiwan       | Human | Pneumonia and bacteremia                           | ST59    |         | 2013 | I, O      |
| 182 | WCH-SK2        | NZ_CP031537                                                     | Highly assembled | Australia    | Human | Pneumoniae, SSTI, Cystic fibrosis                  | ST239   | CC8     | 2009 | PB        |
| 183 | WCUH29         | NZ_CP039156                                                     | Highly assembled | Poland       | Human | MRSA, Osteomyelitis                                | ST5     | CC5     | 2004 | PB        |
| 184 | XQ             | NZ_CP013137                                                     | Highly assembled | China        | Human | Acute skin infections                              | ST121   |         | 2009 | IT        |
| 185 | Z172           | NC_022604, NC_022610, NC_022605                                 | Highly assembled | Taiwan       | Human | VISA, Bacteremia                                   | ST239   | CC8     | 2010 | I, PB     |
| 186 | ZJ5499         | NZ_CP011685                                                     | Highly assembled | China        | Human | Pulmonary infection                                | ST5     | CC5     | 2010 | I         |
| 187 | ZY05           | NZ_CP045472, NZ_CP045473                                        | Highly assembled | China        | Human | Toxic shock syndrome                               | ST338   |         | 2016 | PB        |

Additional File 2

| Sample  | Mastitis Association | SampleType | MastitisScore | SCC (x 1,000 cells/mL) |
|---------|----------------------|------------|---------------|------------------------|
| Sa6     | No                   | L1         | 0             | 214                    |
| Sa4     | No                   | L1         | 0             | 886                    |
| Sa14    | No                   | L1         | 0             | 77                     |
| Sa10    | Yes                  | M1         | 3             | missing value          |
| Sa8     | Yes                  | M1         | 2             | missing value          |
| Sa12    | Yes                  | M1         | 3             | missing value          |
| Sa5     | No                   | V1         | missing value | 4133                   |
| Sa11    | No                   | T1         | 0             | 445                    |
| Sa9     | No                   | L2         | 0             | 11                     |
| Sa22    | Yes                  | M1         | 1             | missing value          |
| Sa21    | No                   | T1         | 0             | 231                    |
| Sa19    | Yes                  | M2         | missing value | missing value          |
| Sa1     | No                   | L1         | 0             | 1008                   |
| Sa24    | Yes                  | M1         | 2             | missing value          |
| Sa3     | No                   | L2         | 1             | 3534                   |
| Sa23    | Yes                  | M1         | 2             | missing value          |
| Sa25    | Yes                  | M2         | missing value | 4571                   |
| Sa7     | No                   | T1         | 0             | 126                    |
| Sa16    | Yes                  | M1         | 2             | missing value          |
| Sa17    | No                   | T1         | 0             | 8483                   |
| Sa18    | Yes                  | M1         | 1             | missing value          |
| Sa27    | Yes                  | M1         | 2             | missing value          |
| Sa28    | Yes                  | M1         | 1             | missing value          |
| Sa29    | Yes                  | M1         | 2             | missing value          |
| Sa30    | Yes                  | M1         | 1             | missing value          |
| Sa31    | Yes                  | M1         | 3             | missing value          |
| Sa2112  | No                   | L1         | 0             | 5162                   |
| Sa2605  | No                   | T2         | 0             | -2                     |
| Sa2946  | No                   | T1         | 0             | 499                    |
| Sa2954  | No                   | V1         | 0             | 2611                   |
| Sa2970  | No                   | T1         | 0             | 3134                   |
| Sa2978  | No                   | L1         | 0             | 1452                   |
| Sa3151  | No                   | T1         | 0             | 1616                   |
| Sa3247  | Yes                  | M2         | 0             | 2706                   |
| Sa3302  | No                   | T2         | 0             | 6038                   |
| Sa3336  | No                   | L3         | 0             | 928                    |
| Sa3489  | No                   | L1         | 0             | 11                     |
| Sa3532  | No                   | L3         | missing value | 149                    |
| Sa3603  | No                   | L3         | 0             | 1713                   |
| Sa3763  | Yes                  | M1         | 1             | missing value          |
| Sa3511  | Yes                  | M1         | 1             | missing value          |
| Sa2539  | No                   | L1         | 0             | 398                    |
| Sa3370  | No                   | L1         | 0             | 3525                   |
| Sa3003  | No                   | L1         | 0             | 2620                   |
| Sa3014  | Yes                  | M2         | missing value | 47                     |
| Sa3199  | Yes                  | M1         | 2             | missing value          |
| Sa3131  | No                   | T1         | 0             | 2188                   |
| Sa2117  | No                   | L1         | 0             | 404                    |
| Sa2911  | No                   | L1         | 0             | 489                    |
| Sa3454  | Yes                  | M1         | 1             | missing value          |
| Sa3468  | Yes                  | M1         | 1             | missing value          |
| Sa3493  | No                   | L1         | 0             | 11                     |
| Sa3353  | No                   | L1         | 0             | 1273                   |
| Sa3022  | Yes                  | M1         | 2             | missing value          |
| Sa3137  | No                   | T1         | 0             | 1577                   |
| Sa3129  | No                   | T1         | 0             | 198                    |
| Sa2925  | No                   | L1         | 0             | 972                    |
| Sa3071  | No                   | L1         | 0             | 9                      |
| Sa3456  | Yes                  | M1         | missing value | 7159                   |
| Sa1158c | No                   | L2         | 0             | 440                    |
| Sa3213  | Yes                  | M1         | 2             | missing value          |
| Sa3154  | Yes                  | M1         | 2             | missing value          |
| Sa3498  | No                   | L1         | 0             | missing value          |

| Legend    |                            |
|-----------|----------------------------|
| M1        | day of diagnostic          |
| M2        | + 14 days after diagnostic |
| L1-L3     | during lactation           |
| T1 and T2 | before drying-off          |
| V1        | after calving              |

## Additional File 3

| <b>Primers</b> | <b>Nucleotides Sequence (5'-3')</b> | <b>Target gene</b> |
|----------------|-------------------------------------|--------------------|
| blaZ-F         | CAAAGATGATATAGTTGCTTATTCTCC         | <i>blaZ</i>        |
| blaZ_R         | TGCTTGACCACTTTTATCAGC               | <i>blaZ</i>        |
| hsdM_F         | ATGTCTATTACTGAAAAACAACG             | <i>hsdM</i>        |
| hsdM_R         | TTACTCATCTTTCAACACCC                | <i>hsdM</i>        |
| CC97_hsdSb_F   | ATAAGAGTGATAAATTTAACCCCTC           | <i>hsdS</i>        |
| CC97_hsdSb_R   | GCTGCAATTCAATTAGTTTTTCATTTT         | <i>hsdS</i>        |
| USA500_hsdSa_F | AGATAGAGTAATTAGGAAAAATAAAAAAC       | <i>hsdS</i>        |
| USA500_hsdSa_R | TTTTTAATTGTTTATATTTTAAGTTCC         | <i>hsdS</i>        |

Additional File 4

| VFclass        | Virulence factors                                | Related genes                                                                                                                                                                  |
|----------------|--------------------------------------------------|--------------------------------------------------------------------------------------------------------------------------------------------------------------------------------|
|                | Autolysin                                        | atl                                                                                                                                                                            |
|                | Cell wall associated fibronectin binding protein | ebh                                                                                                                                                                            |
|                | Clumping factor A                                | clfA                                                                                                                                                                           |
|                | Clumping factor B                                | clfB                                                                                                                                                                           |
|                | Elastin binding protein                          | ebp                                                                                                                                                                            |
|                | Fibrinogen binding protein                       | efb                                                                                                                                                                            |
|                | Fibronectin binding proteins                     | fnbA<br>fnbB                                                                                                                                                                   |
| Adherence      |                                                  | icaA<br>icaB<br>icaC<br>icaD<br>icaR<br>sdrC<br>sdrD<br>sdrE                                                                                                                   |
|                | Intercellular adhesion                           |                                                                                                                                                                                |
|                | Ser-Asp rich fibrinogen-binding proteins         | sdrD<br>sdrE                                                                                                                                                                   |
|                | Staphylococcal protein A                         | spa                                                                                                                                                                            |
|                | Cysteine protease                                | sspB<br>sspC                                                                                                                                                                   |
|                | Hyaluronate lyase                                | hysA                                                                                                                                                                           |
|                | Lipase                                           | geh<br>lip                                                                                                                                                                     |
|                | Serine V8 protease                               | sspA                                                                                                                                                                           |
| Enzyme         |                                                  | spIA<br>spIB<br>spIC<br>spID<br>spIE<br>spIF                                                                                                                                   |
|                | Serine protease                                  | spIC<br>spID<br>spIE<br>spIF                                                                                                                                                   |
|                | Staphylocoagulase                                | coa                                                                                                                                                                            |
|                | von Willebrand factor-binding protein            | vWbp-bov                                                                                                                                                                       |
|                | Thermonuclease                                   | nuc                                                                                                                                                                            |
|                |                                                  | capA<br>cap8B<br>cap8C<br>cap8D<br>cap8E<br>cap8F<br>cap8G<br>cap5H<br>cap5I<br>cap5J<br>cap5K<br>cap8H<br>cap8I<br>cap8J<br>cap8K<br>cap8L<br>cap8M<br>capN<br>cap8O<br>cap8P |
| Immune evasion | Capsule                                          |                                                                                                                                                                                |





|                         | APH3-PRIME | aph3-prime |
|-------------------------|------------|------------|
| MDR regulator           | ARLR       | arlR       |
|                         | ARLS       | arlS       |
|                         | BLAI       | blai       |
| Penicillin resistance   | BLAR       | blaR       |
|                         | BLAZ       | blaZ       |
| Phenicol resistance     | DHAP       | dhaP       |
| Fosfomycin resistance   | FOSB       | fosB       |
| Biocide resistance      | LMRS       | lmrS       |
| Lincosamide resistance  | LNUA       | linA       |
| beta-lactam resistance  | MECA       | mecA       |
|                         | MECR       | mecR       |
|                         | MEPA       | mepA       |
| Multi-drug resistance   | MEPB       | mepB       |
|                         | MEPR       | mepR       |
| MDR regulator           | MGRA       | mgrA       |
| Biocide resistance      | NORA       | norA       |
|                         | NORB       | norB       |
| Biocide resistance      | QACC       | qacC       |
| MLS resistance          | RLMH       | rlmH       |
|                         | TET38      | tet38      |
| Tetracycline resistance | TETK       | tetK       |
|                         | TETM       | tetM       |
